# Supplementary material for: Open Science in German Sport Psychology
Source: Atypon-hosted journal article supplement (doi:10.1026/1612-5010/a000406), 2023-10-01
Supplement: 1612-5010_a000406_esm2.pdf [file 1612-5010_a000406_esm2.pdf]

## Electronic Supplement 2.

Table 1. Open Science-Related Attitudes

|                                                                                                                                                                                                                                                                                     | Item Statistics |           | Absolute and Relative Responses |                                |                    |                          |                                   |                       |
|-------------------------------------------------------------------------------------------------------------------------------------------------------------------------------------------------------------------------------------------------------------------------------------|-----------------|-----------|---------------------------------|--------------------------------|--------------------|--------------------------|-----------------------------------|-----------------------|
|                                                                                                                                                                                                                                                                                     | <i>M</i>        | <i>SD</i> | (1)<br>Trifft gar<br>nicht zu   | (2)<br>Trifft eher<br>nicht zu | (3)<br>Teils/teils | (4)<br>Trifft eher<br>zu | (5)<br>Trifft<br>vollkommen<br>zu | NA<br>Keine<br>Angabe |
| Ich halte es für richtig, meine Forschungsprozesse offen und transparent zu gestalten.                                                                                                                                                                                              | 4.51            | 0.62      | 0<br>0%                         | 0<br>0%                        | 4<br>7%            | 22<br>36%                | 35<br>57%                         | 0<br>0%               |
| Ich halte es für richtig, mit meinen Publikationen anonymisierte Primärdaten, die diesen zugrunde liegen (Datenveröffentlichung Typ 1), online zur Verfügung zu stellen.                                                                                                            | 3.85            | 0.87      | 0<br>0%                         | 3<br>5%                        | 18<br>30%          | 23<br>38%                | 15<br>25%                         | 2<br>3%               |
| Ich halte es für richtig, mit meinen Publikationen die Analysecodes, die den Ergebnissen dieser zugrunde liegen, online zur Verfügung zu stellen.                                                                                                                                   | 3.81            | 0.99      | 1<br>2%                         | 4<br>7%                        | 16<br>26%          | 20<br>33%                | 16<br>26%                         | 4<br>7%               |
| Ich halte es für richtig, mit meinen Publikationen weitere Materialien, die die Durchführungen der berichteten Studie/n näher beschreiben (z.B. Codebooks), online zur Verfügung zu stellen.                                                                                        | 3.97            | 1.02      | 2<br>3%                         | 2<br>3%                        | 13<br>21%          | 21<br>34%                | 21<br>34%                         | 2<br>3%               |
| Ich halte es für richtig, Preprints meiner Manuskripte online zur Verfügung zu stellen.                                                                                                                                                                                             | 3.21            | 1.27      | 7<br>11%                        | 9<br>15%                       | 18<br>30%          | 13<br>21%                | 11<br>18%                         | 3<br>5%               |
| Ich halte es für richtig, Präregistrierungen geplanter Studien online zur Verfügung zu stellen.                                                                                                                                                                                     | 3.98            | 1.06      | 0<br>0%                         | 6<br>10%                       | 14<br>23%          | 12<br>20%                | 25<br>41%                         | 4<br>7%               |
| Ich halte es für richtig, Registered Reports als Publikationsformat in wissenschaftlichen Fachzeitschriften zu nutzen.                                                                                                                                                              | 3.87            | 0.95      | 0<br>0%                         | 4<br>7%                        | 12<br>20%          | 17<br>28%                | 14<br>23%                         | 14<br>23%             |
| Ich halte es für richtig, weitere Materialien (z.B. Vorlesungsfolien) online zur Verfügung zu stellen.                                                                                                                                                                              | 3.49            | 1.04      | 2<br>3%                         | 7<br>11%                       | 23<br>38%          | 17<br>28%                | 12<br>20%                         | 0<br>0%               |
| Ich halte es für richtig, mit der Durchführung von Forschungsprojekten die vollständigen anonymisierten Primärdaten, die in diesen generiert wurden, auch solche, die noch nicht Gegenstand einer Publikation waren (Datenveröffentlichung Typ 2), online zur Verfügung zu stellen. | 3.17            | 0.94      | 1<br>2%                         | 13<br>21%                      | 24<br>39%          | 15<br>25%                | 5<br>8%                           | 3<br>5%               |

Table 2. Open Science-Related Intentions

|                                                                                                                                                                                                                                                                                 | Item Statistics |           | Absolute and Relative Responses |                                |                    |                          |                                   |                       |
|---------------------------------------------------------------------------------------------------------------------------------------------------------------------------------------------------------------------------------------------------------------------------------|-----------------|-----------|---------------------------------|--------------------------------|--------------------|--------------------------|-----------------------------------|-----------------------|
|                                                                                                                                                                                                                                                                                 | <i>M</i>        | <i>SD</i> | (1)<br>Trifft gar<br>nicht zu   | (2)<br>Trifft eher<br>nicht zu | (3)<br>Teils/teils | (4)<br>Trifft eher<br>zu | (5)<br>Trifft<br>vollkommen<br>zu | NA<br>Keine<br>Angabe |
| Ich möchte in Zukunft meine Forschungsprozesse offen und transparent gestalten.                                                                                                                                                                                                 | 4.31            | 0.67      | 0<br>0%                         | 1<br>2%                        | 4<br>7%            | 31<br>51%                | 25<br>41%                         | 0<br>0%               |
| Ich möchte in Zukunft mit meinen Publikationen anonymisierte Primärdaten, die diesen zugrunde liegen (Datenveröffentlichung Typ 1), online zur Verfügung stellen.                                                                                                               | 3.88            | 0.95      | 0<br>0%                         | 6<br>10%                       | 12<br>20%          | 24<br>39%                | 17<br>28%                         | 2<br>3%               |
| Ich möchte in Zukunft mit meinen Publikationen die Analysecodes, die den Ergebnissen dieser zugrunde liegen, online zur Verfügung stellen.                                                                                                                                      | 3.76            | 1.02      | 2<br>3%                         | 4<br>7%                        | 15<br>25%          | 23<br>38%                | 5<br>25%                          | 2<br>3%               |
| Ich möchte in Zukunft mit meinen Publikationen weitere Materialien, die die Durchführungen der berichteten Studie/n näher beschreiben (z.B. Codebooks), online zur Verfügung stellen.                                                                                           | 3.79            | 0.93      | 0<br>0%                         | 5<br>8%                        | 17<br>28%          | 21<br>34%                | 15<br>25%                         | 3<br>5%               |
| Ich möchte in Zukunft Preprints meiner Manuskripte online zur Verfügung stellen.                                                                                                                                                                                                | 3.31            | 1.25      | 5<br>8%                         | 11<br>18%                      | 15<br>25%          | 15<br>25%                | 12<br>20%                         | 3<br>5%               |
| Ich möchte in Zukunft Präregistrierungen geplanter Studien online zur Verfügung stellen.                                                                                                                                                                                        | 3.96            | 0.98      | 0<br>0%                         | 4<br>7%                        | 16<br>26%          | 15<br>25%                | 22<br>36%                         | 4<br>7%               |
| Ich möchte in Zukunft Registered Reports als Publikationsformat in wissenschaftlichen Fachzeitschriften nutzen.                                                                                                                                                                 | 3.62            | 1.09      | 1<br>2%                         | 8<br>13%                       | 14<br>23%          | 16<br>26%                | 13<br>21%                         | 9<br>15%              |
| Ich möchte in Zukunft weitere Materialien (z.B. Vorlesungsfolien) online zur Verfügung zu stellen.                                                                                                                                                                              | 3.32            | 1.07      | 3<br>5%                         | 8<br>13%                       | 26<br>43%          | 13<br>21%                | 10<br>16%                         | 1<br>2%               |
| Ich möchte in Zukunft mit der Durchführung von Forschungsprojekten die vollständigen anonymisierten Primärdaten, die in diesen generiert wurden, auch solche, die noch nicht Gegenstand einer Publikation waren (Datenveröffentlichung Typ 2), online zur Verfügung zu stellen. | 3.16            | 1.17      | 4<br>7%                         | 13<br>21%                      | 18<br>30%          | 12<br>20%                | 9<br>15%                          | 5<br>8%               |

Table 3. Open Science-Related Behaviors

|                                                                                                                                                                                                                                                           | Item Statistics |           | Absolute and Relative Responses |                                |                    |                          |                                   |                       |
|-----------------------------------------------------------------------------------------------------------------------------------------------------------------------------------------------------------------------------------------------------------|-----------------|-----------|---------------------------------|--------------------------------|--------------------|--------------------------|-----------------------------------|-----------------------|
|                                                                                                                                                                                                                                                           | <i>M</i>        | <i>SD</i> | (1)<br>Trifft gar<br>nicht zu   | (2)<br>Trifft eher<br>nicht zu | (3)<br>Teils/teils | (4)<br>Trifft eher<br>zu | (5)<br>Trifft<br>vollkommen<br>zu | NA<br>Keine<br>Angabe |
| Ich gestalte meine Forschungsprozesse offen und transparent.                                                                                                                                                                                              | 4.03            | 0.72      | 0<br>0%                         | 1<br>2%                        | 11<br>18%          | 31<br>51%                | 15<br>25%                         | 3<br>5%               |
| Mit meinen Publikationen stelle ich anonymisierte Primärdaten, die diesen zugrunde liegen (Datenveröffentlichung Typ 1), online zur Verfügung.                                                                                                            | 2.86            | 1.26      | 9<br>15%                        | 15<br>25%                      | 13<br>21%          | 13<br>21%                | 6<br>10%                          | 5<br>8%               |
| Mit meinen Publikationen stelle ich die Analysecodes, die den Ergebnissen dieser zugrunde liegen, online zur Verfügung.                                                                                                                                   | 2.65            | 1.27      | 11<br>18%                       | 15<br>25%                      | 12<br>20%          | 9<br>15%                 | 5<br>8%                           | 9<br>15%              |
| Mit meinen Publikationen stelle ich weitere Materialien, die die Durchführungen der berichteten Studie/n näher beschreiben (z.B. Codebooks, Stimuli, etc.), online zur Verfügung.                                                                         | 2.87            | 1.28      | 10<br>16%                       | 12<br>20%                      | 14<br>23%          | 13<br>21%                | 6<br>10%                          | 6<br>10%              |
| Ich stelle Preprints meiner Manuskripte online zur Verfügung.                                                                                                                                                                                             | 2.46            | 1.44      | 23<br>38%                       | 9<br>15%                       | 11<br>18%          | 9<br>15%                 | 5<br>11%                          | 7<br>3%               |
| Ich stelle Präregistrierungen geplanter Studien online zur Verfügung.                                                                                                                                                                                     | 2.73            | 1.47      | 17<br>28%                       | 10<br>16%                      | 8<br>13%           | 13<br>21%                | 5<br>13%                          | 5<br>8%               |
| Ich nutze Registered Reports als Publikationsformat in wissenschaftlichen Fachzeitschriften.                                                                                                                                                              | 1.76            | 1.03      | 29<br>48%                       | 15<br>25%                      | 5<br>8%            | 4<br>7%                  | 1<br>2%                           | 7<br>11%              |
| Ich stelle sonstige Materialien (z.B. Vortragsfolien) online zur Verfügung.                                                                                                                                                                               | 1.73            | 1.34      | 13<br>21%                       | 16<br>26%                      | 13<br>21%          | 10<br>16%                | 8<br>13%                          | 1<br>2%               |
| Mit der Durchführung von Forschungsprojekten stelle ich die vollständigen anonymisierten Primärdaten, die in diesen generiert wurden, auch solche, die noch nicht Gegenstand einer Publikation waren (Datenveröffentlichung Typ 2), online zur Verfügung. | 1.72            | 0.98      | 30<br>49%                       | 14<br>23%                      | 5<br>8%            | 5<br>8%                  | 0<br>0%                           | 7<br>11%              |

Table 4. Potential Explanations of an Open Science-Related Intention-Behavior Gap

|                                                                                                                                                                                             | Item Statistics |           | Absolute and Relative Responses |                                |                    |                          |                                   |                       |
|---------------------------------------------------------------------------------------------------------------------------------------------------------------------------------------------|-----------------|-----------|---------------------------------|--------------------------------|--------------------|--------------------------|-----------------------------------|-----------------------|
|                                                                                                                                                                                             | <i>M</i>        | <i>SD</i> | (1)<br>Trifft gar<br>nicht zu   | (2)<br>Trifft eher<br>nicht zu | (3)<br>Teils/teils | (4)<br>Trifft eher<br>zu | (5)<br>Trifft<br>vollkommen<br>zu | NA<br>Keine<br>Angabe |
| Der Aufwand für einen offenen und transparenten Forschungsprozess steht in keinem Verhältnis zum Ertrag.                                                                                    | 2.83            | 0.99      | 5<br>8%                         | 14<br>23%                      | 21<br>34%          | 11<br>18%                | 2<br>3%                           | 8<br>13%              |
| Die Umsetzung eines offenen und transparenten Forschungsprozesses ist im aktuellen Umfeld schlecht für meine Karriere.                                                                      | 1.90            | 0.96      | 25<br>41%                       | 20<br>33%                      | 9<br>15%           | 5<br>8%                  | 0<br>0%                           | 2<br>3%               |
| Ich würde meine Forschungsprozesse gerne offener und transparenter gestalten, aber nur, wenn alle anderen Forscher:innen auch dazu verpflichtet sind (bzw. die große Mehrheit es auch tut). | 3.00            | 1.30      | 10<br>16%                       | 11<br>18%                      | 15<br>25%          | 15<br>25%                | 8<br>13%                          | 2<br>3%               |
| Ich habe Angst, dass nach einer Veröffentlichung von Daten und Analysecode Auswertungsfehler bei meinen Studien entdeckt werden.                                                            | 2.64            | 1.05      | 8<br>13%                        | 22<br>36%                      | 17<br>28%          | 12<br>20%                | 2<br>3%                           | 0<br>0%               |
| Ich habe die Befürchtung, einen Wettbewerbsnachteil zu haben, wenn ich meine Forschungsprozesse offen und transparent gestalte.                                                             | 2.25            | 1.18      | 20<br>33%                       | 19<br>31%                      | 12<br>20%          | 7<br>11%                 | 3<br>5%                           | 0<br>0%               |
| Ich kann davon profitieren, meine Forschungsprozesse offen und transparent zu gestalten.                                                                                                    | 3.53            | 1.01      | 1<br>2%                         | 10<br>16%                      | 14<br>23%          | 25<br>41%                | 9<br>15%                          | 2<br>3%               |
| Mir fehlt die Zeit, mich mit offener und transparenter Forschung intensiver zu beschäftigen.                                                                                                | 3.59            | 1.01      | 2<br>3%                         | 6<br>10%                       | 16<br>26%          | 24<br>39%                | 10<br>16%                         | 3<br>5%               |
| Ich habe keine konkrete Vorstellung davon, wie ich meine Forschungsprozesse offener und transparenter gestalten kann.                                                                       | 2.65            | 1.04      | 7<br>11%                        | 23<br>38%                      | 16<br>26%          | 12<br>20%                | 2<br>3%                           | 1<br>2%               |
| Mir fehlen Fortbildungsangebote im Bereich Open Science.                                                                                                                                    | 2.97            | 1.34      | 10<br>16%                       | 14<br>23%                      | 12<br>20%          | 14<br>23%                | 9<br>15%                          | 2<br>3%               |
| Ich habe die Sorge, dass ich die Zeit, die ich für das offene und transparente Forschen benötige, besser in das Schreiben wissenschaftlicher Artikel investieren sollte.                    | 3.45            | 1.11      | 4<br>7%                         | 7<br>11%                       | 15<br>25%          | 23<br>38%                | 9<br>15%                          | 3<br>5%               |

Table 5. Open Science-Related General and Specific Attitudes

|                                                                                                                                                                                                          | Item Statistics |           | Absolute and Relative Responses |                                |                    |                          |                                   |                       |
|----------------------------------------------------------------------------------------------------------------------------------------------------------------------------------------------------------|-----------------|-----------|---------------------------------|--------------------------------|--------------------|--------------------------|-----------------------------------|-----------------------|
|                                                                                                                                                                                                          | <i>M</i>        | <i>SD</i> | (1)<br>Trifft gar<br>nicht zu   | (2)<br>Trifft eher<br>nicht zu | (3)<br>Teils/teils | (4)<br>Trifft eher<br>zu | (5)<br>Trifft<br>vollkommen<br>zu | NA<br>Keine<br>Angabe |
| Wissenschaft sollte offen und transparent sein.                                                                                                                                                          | 4.68            | 0.50      | 0<br>0%                         | 0<br>0%                        | 1<br>2%            | 17<br>28%                | 42<br>69%                         | 1<br>2%               |
| Ein offener und transparenter Forschungsprozess ist generell überflüssig.                                                                                                                                | 1.34            | 0.51      | 41<br>67%                       | 19<br>31%                      | 1<br>2%            | 0<br>0%                  | 0<br>0%                           | 0<br>0%               |
| Ein offener und transparenter Forschungsprozess ist gut für die Wissenschaft                                                                                                                             | 4.68            | 0.50      | 0<br>0%                         | 0<br>0%                        | 1<br>2%            | 17<br>28%                | 42<br>69%                         | 1<br>2%               |
| Ein offener und transparenter Forschungsprozess wird bald die Regel sein.                                                                                                                                | 3.35            | 0.95      | 1<br>2%                         | 11<br>18%                      | 15<br>25%          | 24<br>39%                | 5<br>7%                           | 6<br>10%              |
| Es sollte selbstverständlich sein, dass Forschungsprozesse offen und transparent gestaltet werden.                                                                                                       | 4.34            | 0.73      | 0<br>0%                         | 0<br>0%                        | 9<br>15%           | 22<br>36%                | 30<br>49%                         | 0<br>0%               |
| Ich habe größeres Vertrauen in Studienergebnisse, wenn der Forschungsprozess offengelegt wurde.                                                                                                          | 4.14            | 0.96      | 1<br>2%                         | 3<br>5%                        | 8<br>13%           | 22<br>36%                | 25<br>41%                         | 2<br>3%               |
| Ich habe größeres Vertrauen in Wissenschaftler:innen, die ihre Forschungsprozesse offen und transparent gestalten.                                                                                       | 3.85            | 1.02      | 1<br>2%                         | 6<br>10%                       | 12<br>20%          | 23<br>38%                | 18<br>30%                         | 1<br>2%               |
| Bei Stellenbesetzungen sollten bei ansonsten vergleichbarer Leistung Bewerber:innen bevorzugt werden, die ihre Forschungsprozesse offen und transparent gestalten.                                       | 3.24            | 1.27      | 5<br>8%                         | 13<br>21%                      | 10<br>16%          | 16<br>26%                | 10<br>16%                         | 7<br>11%              |
| Ich befürworte es, wenn Zeitschriften die Datenveröffentlichung Typ 1 (publikationsgebunden) obligatorisch machen.                                                                                       | 3.38            | 1.13      | 3<br>5%                         | 9<br>15%                       | 17<br>28%          | 16<br>26%                | 10<br>16%                         | 6<br>10%              |
| Ich befürworte es, wenn Zeitschriften die Veröffentlichung von Analysecode (publikationsgebunden) obligatorisch machen.                                                                                  | 3.16            | 1.09      | 5<br>8%                         | 9<br>15%                       | 19<br>31%          | 18<br>30%                | 5<br>8%                           | 5<br>8%               |
| Ich befürworte es, wenn Zeitschriften der Veröffentlichung von Manuskripten, in denen präregistrierte Studien berichtet werden, gegenüber denjenigen, in denen das nicht der Fall ist, den Vorzug geben. | 3.16            | 1.17      | 4<br>7%                         | 15<br>25%                      | 12<br>20%          | 18<br>30%                | 7<br>11%                          | 5<br>8%               |
| Ich befürworte es, wenn Zeitschriften die Einreichung von Registered Reports ermöglichen.                                                                                                                | 4.14            | 0.95      | 0<br>0%                         | 4<br>7%                        | 7<br>11%           | 17<br>28%                | 22<br>36%                         | 11<br>18%             |
| Ich befürworte es, wenn öffentliche Förderinstitutionen (z.B. die DFG) die Datenveröffentlichung Typ 1 (publikationsgebunden) voraussetzen.                                                              | 3.47            | 1.14      | 2<br>3%                         | 10<br>16%                      | 13<br>21%          | 17<br>28%                | 11<br>18%                         | 8<br>13%              |

---

|                                                                                                                                        |      |      |    |     |     |     |    |     |
|----------------------------------------------------------------------------------------------------------------------------------------|------|------|----|-----|-----|-----|----|-----|
| Ich befürworte es, wenn öffentliche Förderinstitutionen (z.B. die DFG) die Datenveröffentlichung Typ 2 (projektgebunden) voraussetzen. | 3.02 | 1.07 | 4  | 12  | 18  | 13  | 4  | 10  |
|                                                                                                                                        |      |      | 7% | 20% | 30% | 21% | 7% | 16% |

---
