# Supplementary material for: Open Science in German Sport Psychology
Source: Atypon-hosted journal article supplement (doi:10.1026/1612-5010/a000406), 2023-10-01
Supplement: 1612-5010_a000406_esm3.pdf [file 1612-5010_a000406_esm3.pdf]

## Electronic Supplement 3. Detailed Results.

**Table 1.** *Open Science-Related Attitudes, Behaviors, and Intentions*

|                                                           |           | Item Statistics |           |          |           |          |           |              |           |
|-----------------------------------------------------------|-----------|-----------------|-----------|----------|-----------|----------|-----------|--------------|-----------|
|                                                           |           | Whole Sample    |           | Predocs  |           | Postdocs |           | (Jun.) Profs |           |
|                                                           |           | <i>M</i>        | <i>SD</i> | <i>M</i> | <i>SD</i> | <i>M</i> | <i>SD</i> | <i>M</i>     | <i>SD</i> |
| Open and transparent research processes                   | Attitude  | 4.51            | 0.62      | 4.48     | 0.51      | 4.47     | 0.72      | 4.57         | 0.68      |
|                                                           | Intention | 4.31            | 0.67      | 4.22     | 0.52      | 4.47     | 0.62      | 4.29         | 0.85      |
|                                                           | Behavior  | 4.03            | 0.72      | 4.25     | 0.64      | 3.88     | 0.60      | 3.95         | 0.86      |
| Publication of anonymized primary data with publications. | Attitude  | 3.85            | 0.87      | 4.04     | 0.98      | 3.65     | 0.86      | 3.90         | 0.85      |
|                                                           | Intention | 3.88            | 0.95      | 3.82     | 0.85      | 3.94     | 1.03      | 3.90         | 1.02      |
|                                                           | Behavior  | 2.86            | 1.26      | 2.84     | 1.26      | 2.94     | 1.48      | 2.80         | 1.11      |
| Publication of codes with publications.                   | Attitude  | 3.81            | 0.99      | 4.04     | 0.98      | 3.80     | 0.86      | 3.65         | 1.18      |
|                                                           | Intention | 3.76            | 1.02      | 3.95     | 0.72      | 3.94     | 1.03      | 3.40         | 1.23      |
|                                                           | Behavior  | 2.65            | 1.27      | 2.82     | 1.55      | 2.73     | 1.16      | 2.45         | 1.10      |
| Publication of materials with publications.               | Attitude  | 3.97            | 1.02      | 4.13     | 1.14      | 4.00     | 0.71      | 3.85         | 1.18      |
|                                                           | Intention | 3.79            | 0.93      | 3.86     | 0.85      | 3.82     | 0.88      | 3.70         | 1.08      |
|                                                           | Behavior  | 2.87            | 1.28      | 2.72     | 1.56      | 2.94     | 1.14      | 2.95         | 1.15      |
| Publication of preprints                                  | Attitude  | 3.21            | 1.27      | 3.39     | 1.34      | 3.19     | 1.22      | 3.15         | 1.39      |
|                                                           | Intention | 3.31            | 1.25      | 3.41     | 1.14      | 3.18     | 1.24      | 3.32         | 1.42      |
|                                                           | Behavior  | 2.46            | 1.44      | 2.29     | 1.62      | 2.35     | 1.22      | 2.71         | 1.45      |
| Publication of preregistrations                           | Attitude  | 3.98            | 1.06      | 4.35     | 1.07      | 3.76     | 1.09      | 3.95         | 1.13      |
|                                                           | Intention | 3.96            | 0.98      | 4.10     | 0.94      | 3.65     | 1.06      | 4.11         | 0.94      |
|                                                           | Behavior  | 2.73            | 1.47      | 2.80     | 1.67      | 2.38     | 1.54      | 2.95         | 1.19      |
| Registered Report as publication format                   | Attitude  | 3.87            | 0.95      | 4.39     | 1.23      | 4.08     | 0.76      | 3.76         | 1.15      |
|                                                           | Intention | 3.62            | 1.09      | 3.84     | 0.90      | 3.44     | 1.03      | 3.53         | 1.33      |
|                                                           | Behavior  | 1.76            | 1.03      | 1.39     | 0.61      | 1.62     | 0.89      | 2.20         | 1.28      |
| Publication of additional material                        | Attitude  | 3.49            | 1.04      | 3.43     | 0.90      | 3.65     | 1.06      | 3.43         | 1.21      |
|                                                           | Intention | 3.32            | 1.07      | 3.32     | 1.04      | 3.29     | 1.05      | 3.33         | 1.15      |
|                                                           | Behavior  | 1.73            | 1.34      | 2.14     | 1.25      | 2.94     | 1.25      | 3.19         | 1.33      |
| Publication of complete anonymized primary project data.  | Attitude  | 3.17            | 0.94      | 3.17     | 0.78      | 3.38     | 0.89      | 3.00         | 1.15      |
|                                                           | Intention | 3.16            | 1.17      | 3.05     | 0.94      | 3.18     | 1.19      | 3.26         | 1.41      |
|                                                           | Behavior  | 1.72            | 0.98      | 1.26     | 0.56      | 1.73     | 0.88      | 2.15         | 1.18      |

*Note.* Predocs ( $n = 23$ ), Postdocs ( $n = 17$ ), (Jun.) Profs ( $n = 21$ )

**Table 2***Open Science-Related General Attitudes (in descending order within domains)*

|                                                                             | Item Statistics |           |                 |           |                  |           |
|-----------------------------------------------------------------------------|-----------------|-----------|-----------------|-----------|------------------|-----------|
|                                                                             | Whole Sample    |           | Low OS Behavior |           | High OS Behavior |           |
|                                                                             | <i>M</i>        | <i>SD</i> | <i>M</i>        | <i>SD</i> | <i>M</i>         | <i>SD</i> |
| <i>Global Attitudes</i>                                                     |                 |           |                 |           |                  |           |
| Science should be open and transparent.                                     | 4.68            | 0.50      | 4.64            | 0.54      | 4.74             | 0.45      |
| An open and transparent research process is good for science.               | 4.68            | 0.50      | 4.67            | 0.53      | 4.79             | 0.42      |
| An open and transparent research process is not superfluous.*               | 4.66            | 0.51      | 4.65            | 0.54      | 4.68             | 0.48      |
| An open and transparent research process should be the norm.                | 4.34            | 0.73      | 4.22            | 0.75      | 4.53             | 0.70      |
| An open and transparent research process increasing trust in study results. | 4.14            | 0.96      | 3.89            | 1.09      | 4.47             | 0.51      |
| An open and transparent research process increasing trust in scientists.    | 3.85            | 1.02      | 3.68            | 1.06      | 4.11             | 0.81      |
| An open and transparent research process will be the norm.                  | 3.35            | 0.95      | 3.35            | 0.95      | 3.44             | 0.86      |
| <i>Specific Attitudes</i>                                                   |                 |           |                 |           |                  |           |
| Journals providing registered reports as publications format.               | 4.14            | 0.95      | 3.91            | 0.95      | 4.67             | 0.82      |
| Grant institutions making data publication with publications obligatory.    | 3.47            | 1.14      | 3.19            | 1.08      | 3.89             | 1.20      |
| Journals making data publication with publications obligatory.              | 3.38            | 1.13      | 3.12            | 1.10      | 3.74             | 1.19      |
| Consideration of Open Science for selection on scientific positions.        | 3.24            | 1.27      | 2.81            | 1.25      | 3.84             | 1.07      |
| Journals' preference for preregistered vs. not preregistered submissions.   | 3.16            | 1.17      | 2.88            | 1.17      | 4.67             | 0.82      |
| Journals making code publication with publications obligatory.              | 3.16            | 1.09      | 2.94            | 1.15      | 3.42             | 0.96      |
| Grant institutions making data publication of projects obligatory.          | 3.02            | 1.07      | 2.83            | 1.02      | 3.26             | 1.15      |

Note. OS = Open Science Behavior; High vs. Low Open Science Behavior was defined based on two behavior variables: general OS behavior and preregistrations; if both responses were greater than 3, participants were included into the High OS Behavior group ( $n = 19$ ), if they were not, participants were included into the Low OS behavior group ( $n = 37$ ); \* = assessed reversed coded: "An open and transparent research process is generally superfluous."

**Table 3***Potential Explanations (in descending order) for an Open Science-Related Intention-Behavior Gap*

|                                                                    | Items Statistics |           |                 |           |                  |           |
|--------------------------------------------------------------------|------------------|-----------|-----------------|-----------|------------------|-----------|
|                                                                    | Whole Sample     |           | Low OS Behavior |           | High OS Behavior |           |
|                                                                    | <i>M</i>         | <i>SD</i> | <i>M</i>        | <i>SD</i> | <i>M</i>         | <i>SD</i> |
| No time.                                                           | 3.59             | 1.01      | 3.78            | 0.80      | 3.16             | 1.26      |
| Worry that time is better invested in writing papers.              | 3.45             | 1.11      | 3.78            | 0.87      | 2.68             | 1.16      |
| Doing so only if all other scientists are forced to do so as well. | 3.00             | 1.30      | 3.19            | 1.35      | 2.61             | 1.24      |
| Lack of training opportunities.                                    | 2.97             | 1.34      | 3.00            | 1.43      | 2.68             | 1.16      |
| Bad cost-benefit ratio.                                            | 2.83             | 0.99      | 3.18            | 0.88      | 2.21             | 0.92      |
| Not a concrete idea.                                               | 2.65             | 1.04      | 2.59            | 0.93      | 2.53             | 1.12      |
| Anxiety that analytic mistakes will be detected.                   | 2.64             | 1.05      | 2.73            | 1.04      | 2.37             | 0.96      |
| No benefit.                                                        | 2.47             | 1.01      | 2.57            | 0.99      | 2.16             | 0.96      |
| Worry to have a competitive disadvantage.                          | 2.25             | 1.18      | 2.30            | 1.27      | 1.95             | 0.85      |
| Bad for my career.                                                 | 1.90             | 0.96      | 1.97            | 1.03      | 1.79             | 0.85      |

Note. OS = Open Science Behavior; High vs. Low Open Science Behavior was defined based on two behavior variables: general OS behavior and preregistrations; if both responses were greater than 3, participants were included into the High OS Behavior group ( $n = 19$ ), if they were not, participants were included into the Low OS behavior group ( $n = 37$ ). The response formats ranged from 1 = *does not apply at all* to 5 = *applies completely*.
